# Supplementary material
Source: MDPI journal article supplement (https://www.mdpi.com/2073-4468/13/1/14)
Supplement: s1 [file s1]

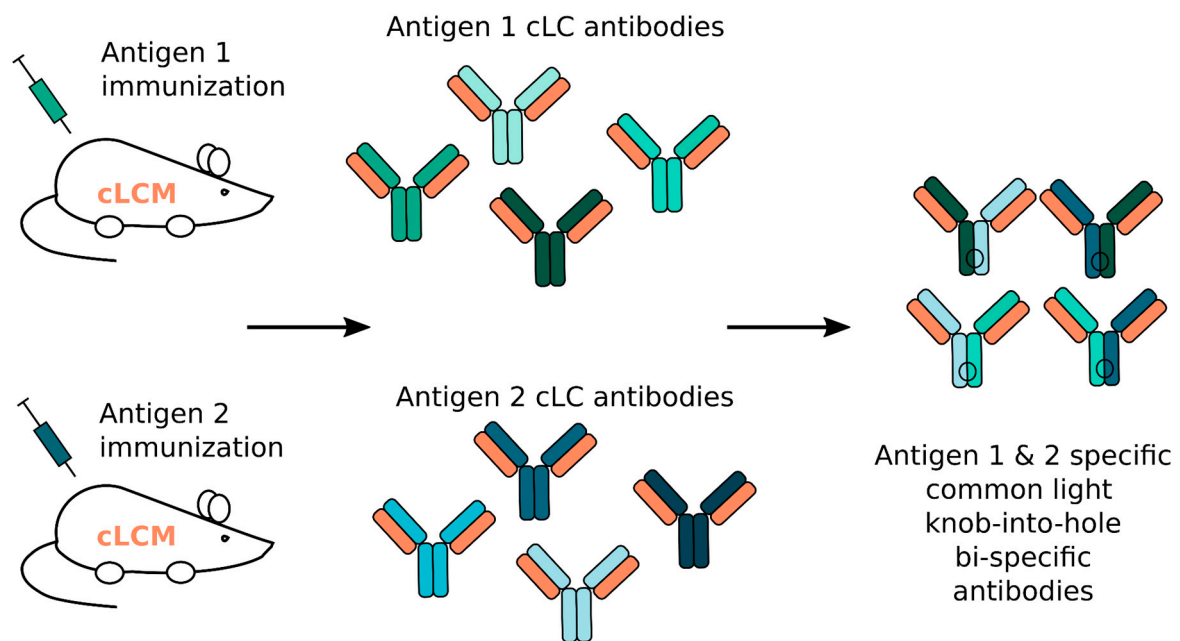

**Supplementary Figure S1:** Schematic outline of a common light chain discovery workflow utilizing a common light chain mouse model (cLCM). Two separate immunization campaigns against two different antigens (1 & 2) yield two common light chain immune repertoires specific for the two antigens. In a second step, bi-specific antibodies are generated by combining common light chain antibodies with different specificities into one molecule using a knob-into-hole antibody format.

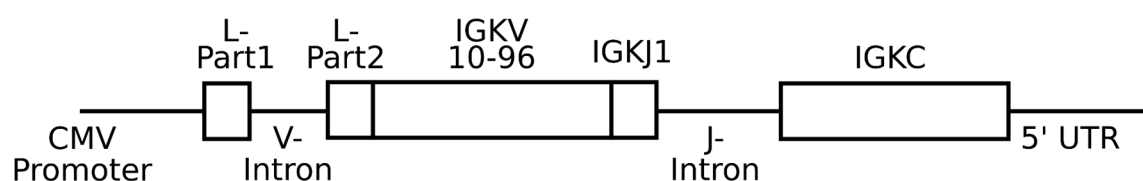

**Supplementary Figure S2:** Layout of the expression vector to test for correctly spliced transcript. See material and methods for details.

wildtype: C57/BL6

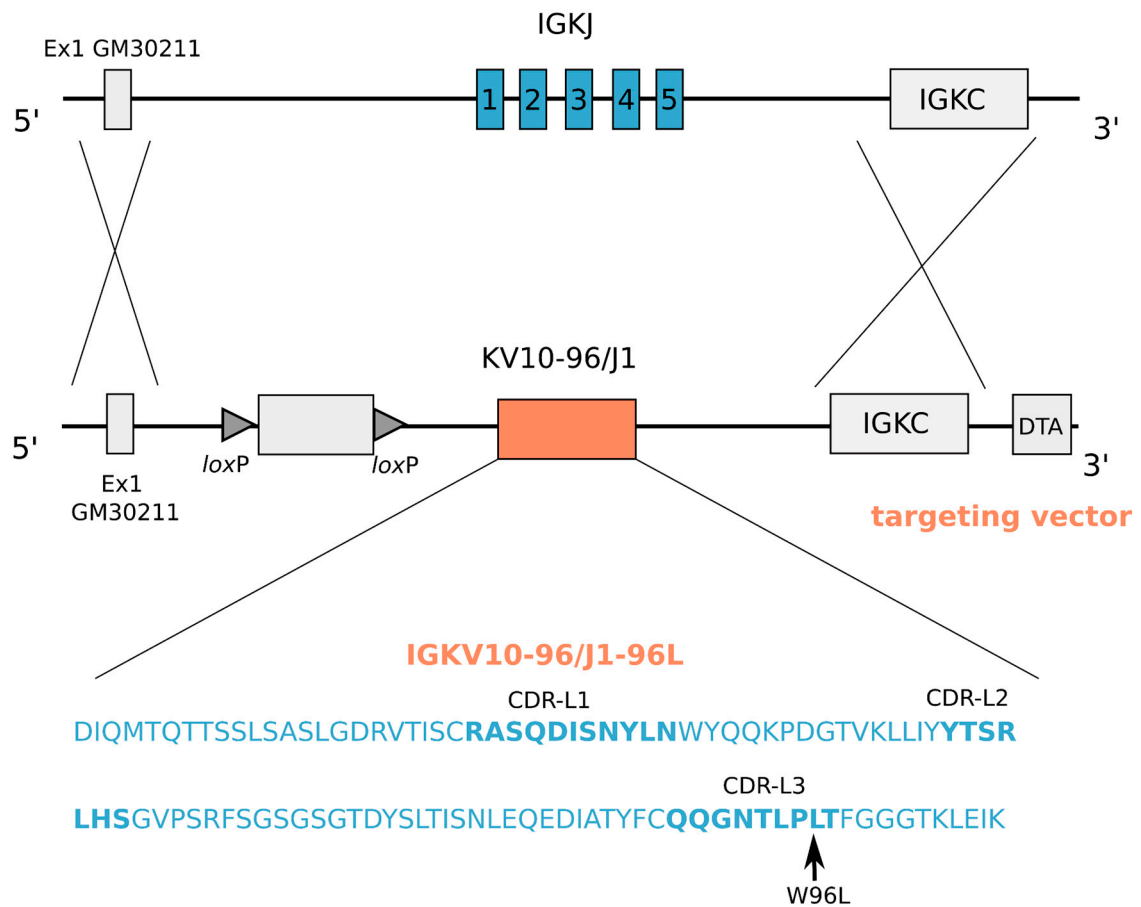

**Supplementary Figure S3:** Schematic showing the process to generate the common light chain mouse model by knock-in via homologous recombination.

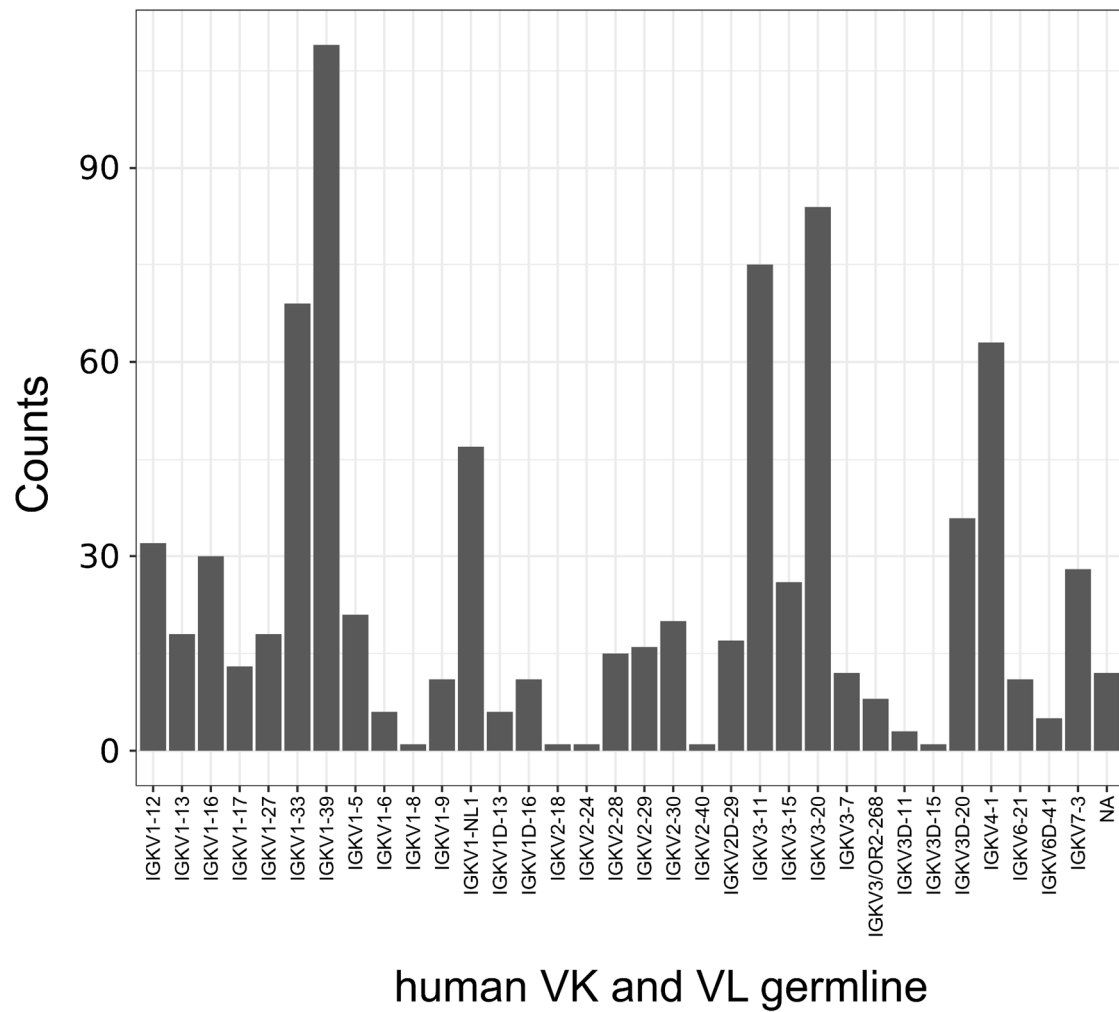

**Supplementary Figure S4:** Bar graph showing the light chain V-gene usage in antibodies which have been approved or are currently under clinical development.

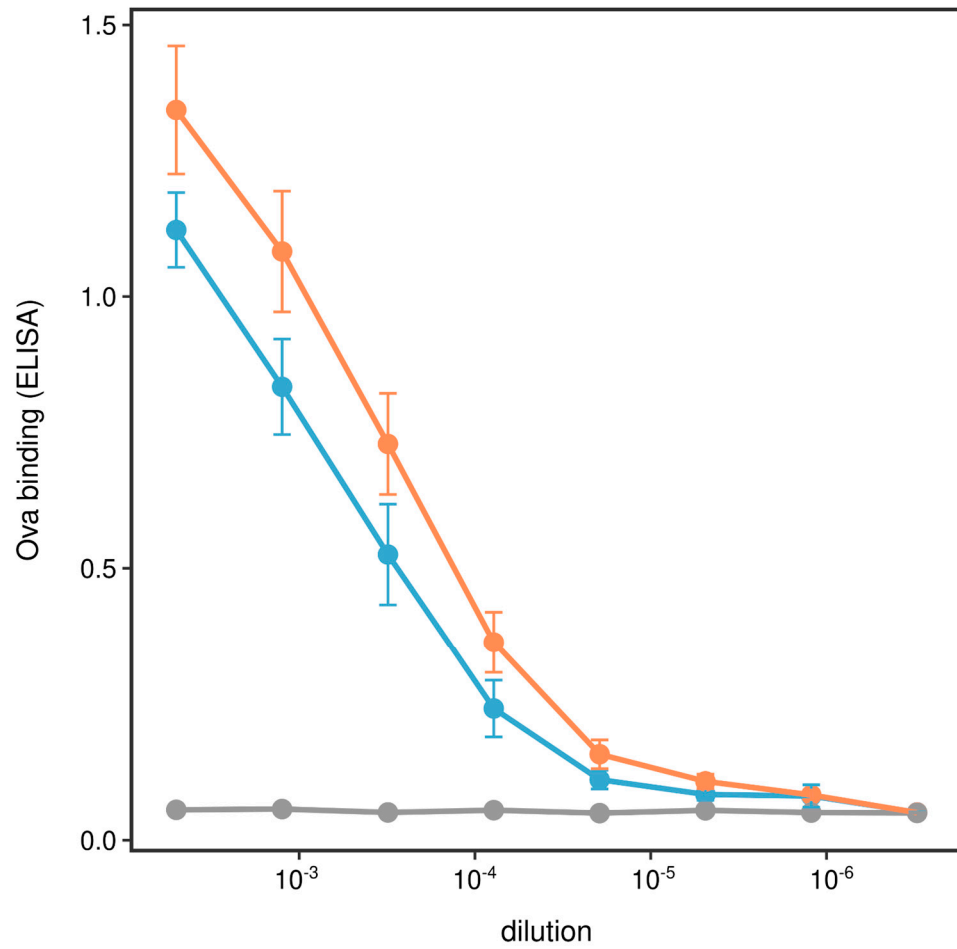

**Supplementary Figure S5:** Titration using ELISA to assess ovalbumin binding of serum from wildtype C57BL/6 (blue) and cLCM animals (red) immunized with ovalbumin.

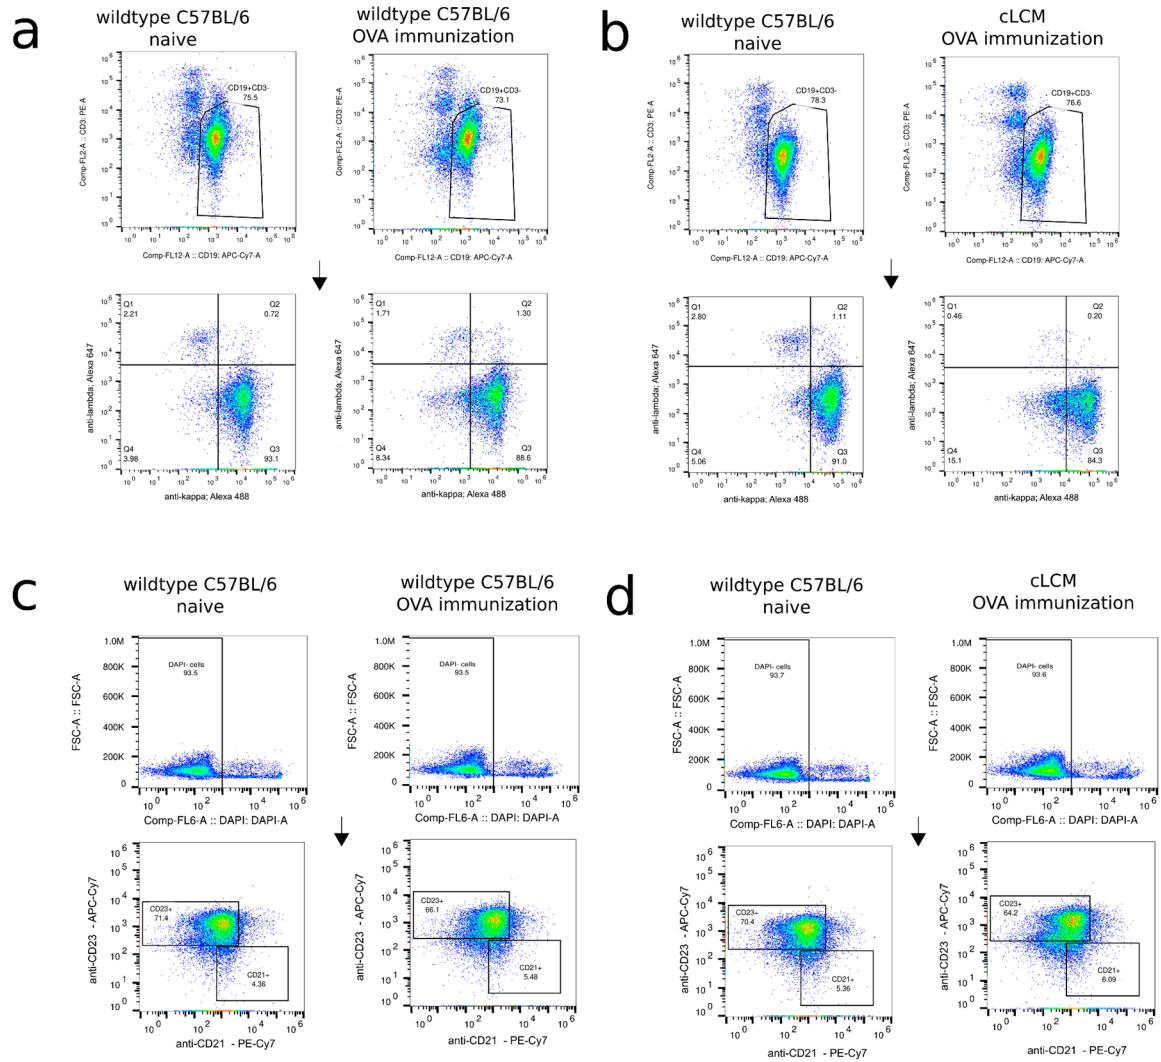

**Supplementary Figure S6:** Phenotypic comparison of B-cells in naive and ovalbumin immunized mice. (a.) Comparison of staining of CD19+ /CD3- B-cells for lambda and kappa chain in naive wildtype C57BL/6 and wildtype C57BL/6 immunized with ovalbumin. (b.) Comparison of staining of CD19+ /CD3- B-cells for lambda and kappa chain in naive wildtype C57BL/6 and cLCM immunized with ovalbumin. (c.) Comparison of staining for CD21 and CD23 markers in naive wildtype C57BL/6 and wildtype C57BL/6 immunized with ovalbumin. (d.) Comparison of staining for CD21 and CD23 markers in naive wildtype C57BL/6 and cLCM immunized with ovalbumin.

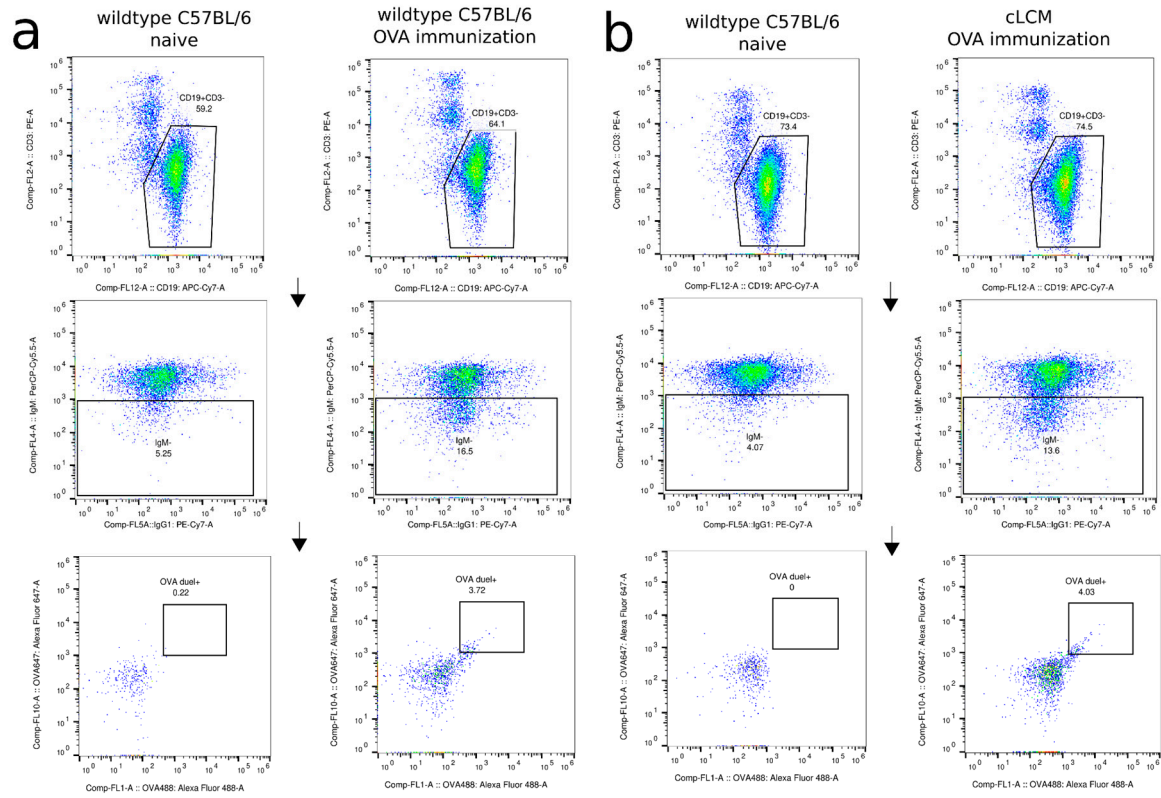

**Supplementary Figure S7:** Sorting strategy to isolated CD19+/CD3-/IgM-/OVA+ B cells from (a.) wildtype C57BL/6 mice and (b.) cLCM immunized with ovalbumine. Specificity of the sorting gates is validated using CD19+/CD3-/IgM- B cells from naive C57BL/6 animals.

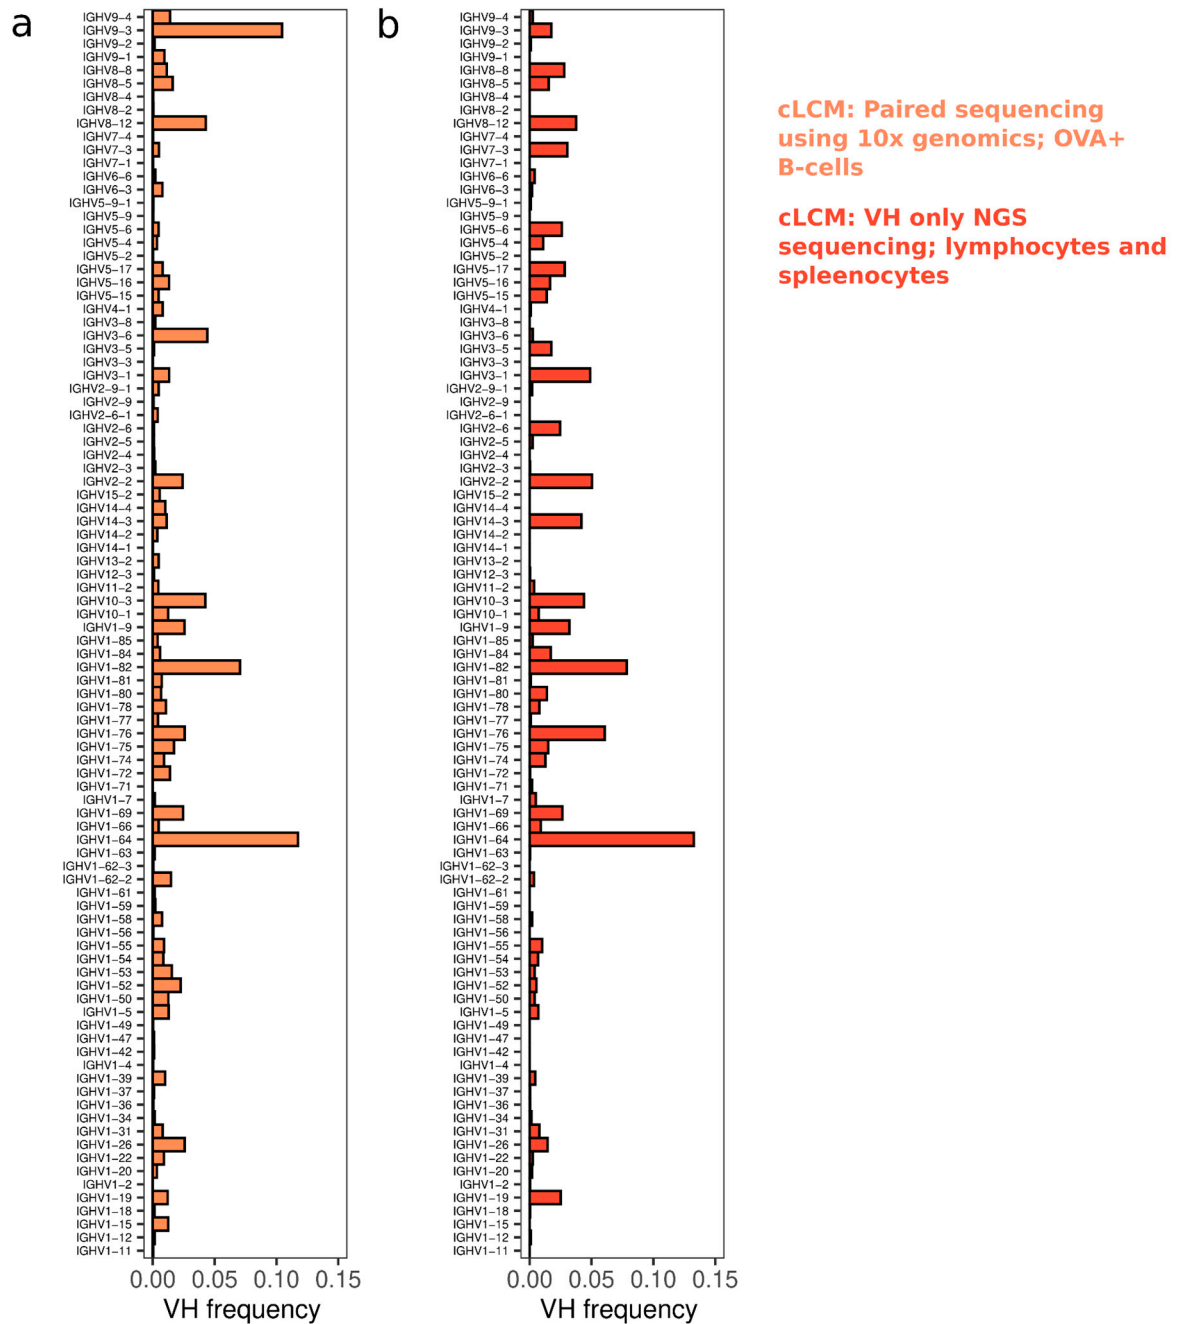

**Supplementary Figure S8:** Comparison of the IGHV gene usage in the antibody repertoire of the cLCM sequenced (a.) using 10x genomics paired seq ( $n=3859$  sequences) and (b.) VH only repertoire sequencing ( $n=199461$  sequences).

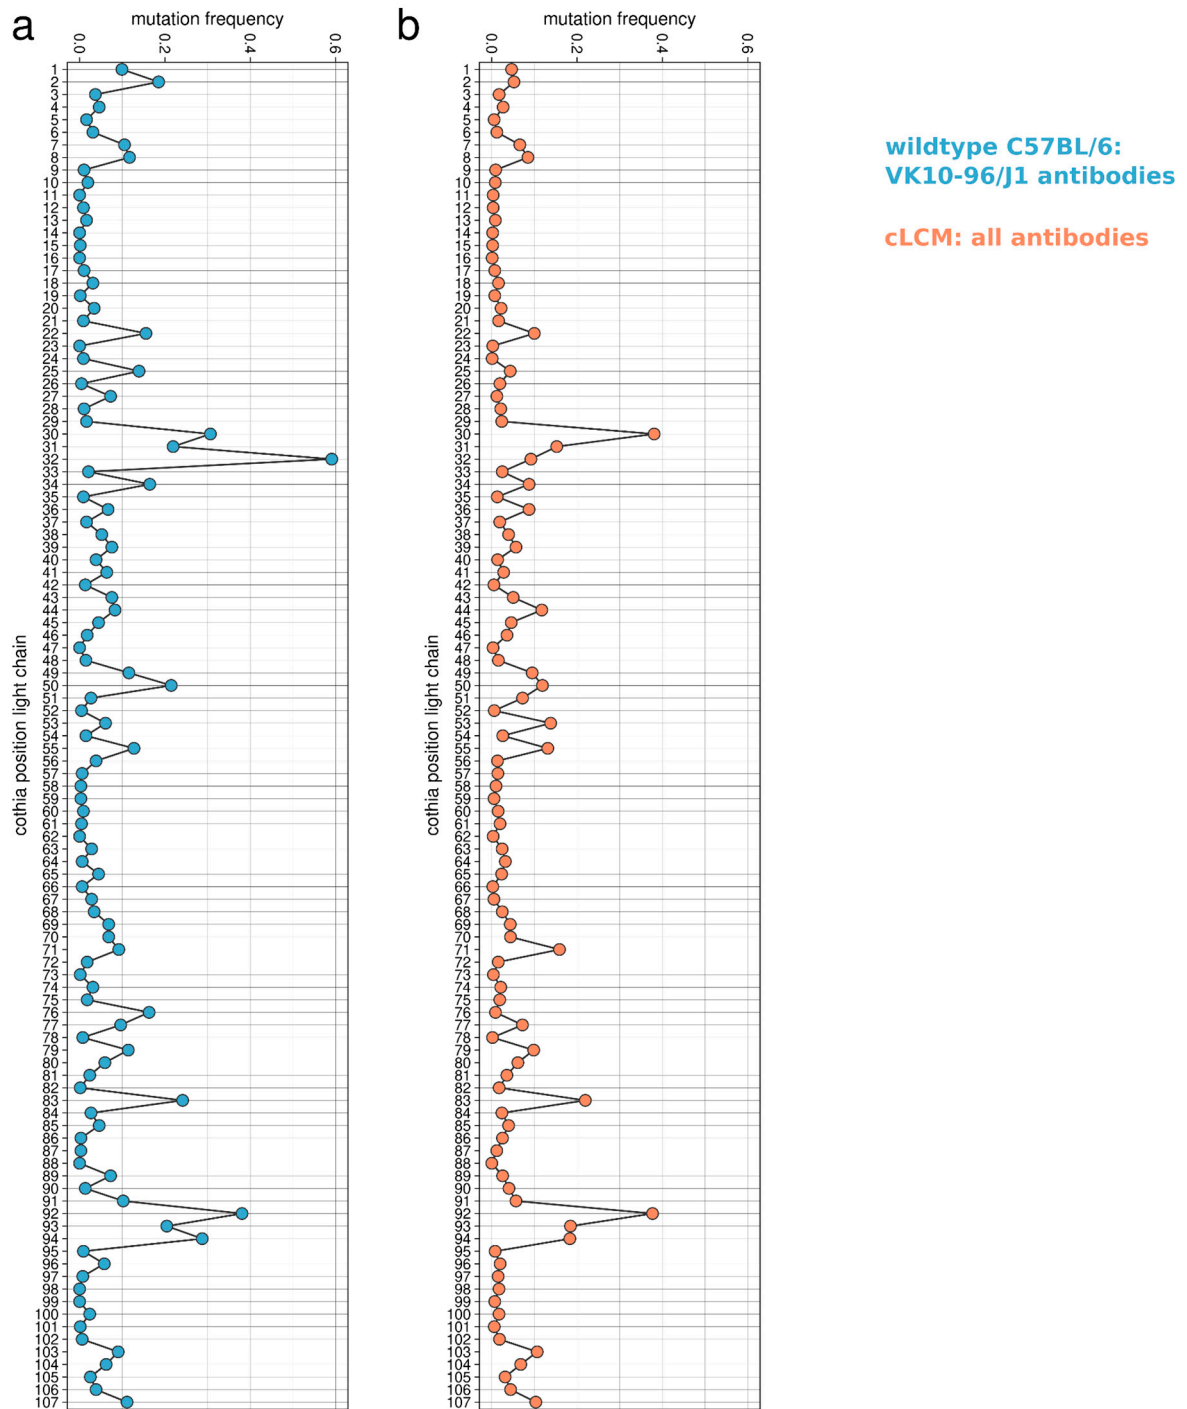

**Supplementary Figure S9:** Observed frequency of non-sense mutation from SHM resulting in amino acid changes for position 1 to 107 antibodies carrying IGKV10-96-J1 derived light chains in (a.) C57BL/6 ( $n=675$  sequences) or (b.) cLCM ( $n=3420$  sequences).
